# Supplementary material for: Fluorescent and magnetic dual-responsive coreshell imprinting microspheres strategy for recognition and detection of phycocyanin
Source: Royal Society of Chemistry journal article supplement (doi:10.1039/c4ra00668b), 2014-01-01
Supplement: c4ra00668b1.pdf [file c4ra00668b1.pdf]

*Electronic Supporting Information for*

**Fluorescent and magnetic dual-responsive coreshell imprinting microspheres strategy for recognition and detection of phycocyanin**

Zhong Zhang<sup>ac</sup>, Jinhua Li<sup>a</sup>, Junqing Fu<sup>ab</sup>, Lingxin Chen<sup>a\*</sup>

<sup>a</sup> Key Laboratory of Coastal Environmental Processes and Ecological Remediation, Yantai

Institute of Coastal Zone Research, Chinese Academy of Sciences, Yantai 264003, China

<sup>b</sup> College of Chemistry and Chemical Engineering, Qufu Normal University, Qufu 273165,

China

<sup>c</sup> University of Chinese Academy of Sciences, Beijing 100049, China

---

\* Corresponding author. Tel/Fax: +86 535 2109130.

E-mail address: lxchen@yic.ac.cn (L. Chen).

**Fig. S1** Size distribution of C-MIP obtained by laser particle analyzer.

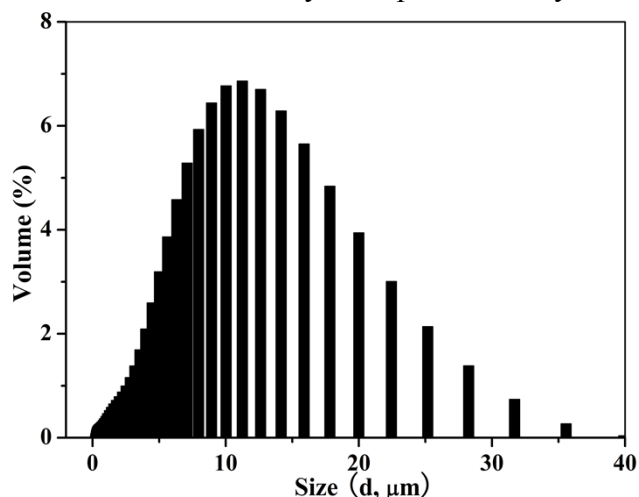

**Fig. S2** (a) Adsorption isotherm of MIPs and NIPs for phycocyanin in aqueous solution, (b) adsorption kinetics of C-MIP, N-MIP and C-NIP for phycocyanin in aqueous solution, (c) adsorption selectivity of C-MIP and C-NIP for phycocyanin, LZM, CEA, and BSA in aqueous solution, and (d) stability and regeneration of the C-MIP and C-NIP for phycocyanin. Experimental conditions: (a)  $V = 2.0$  mL; mass of polymer, 20 mg; adsorption time, 12 h. (b)  $V = 100$  mL;  $C_0 = 0.01$  mg/mL; mass of polymer, 100 mg. (c)  $V = 2.0$  mL;  $C_0 = 0.5$  mg/mL; mass of polymer, 20 mg; adsorption time, 12 h. (d)  $V = 10$  mL;  $C_0 = 0.02$  mg/mL; the mass of polymer, 20 mg; adsorption time, 3 h.

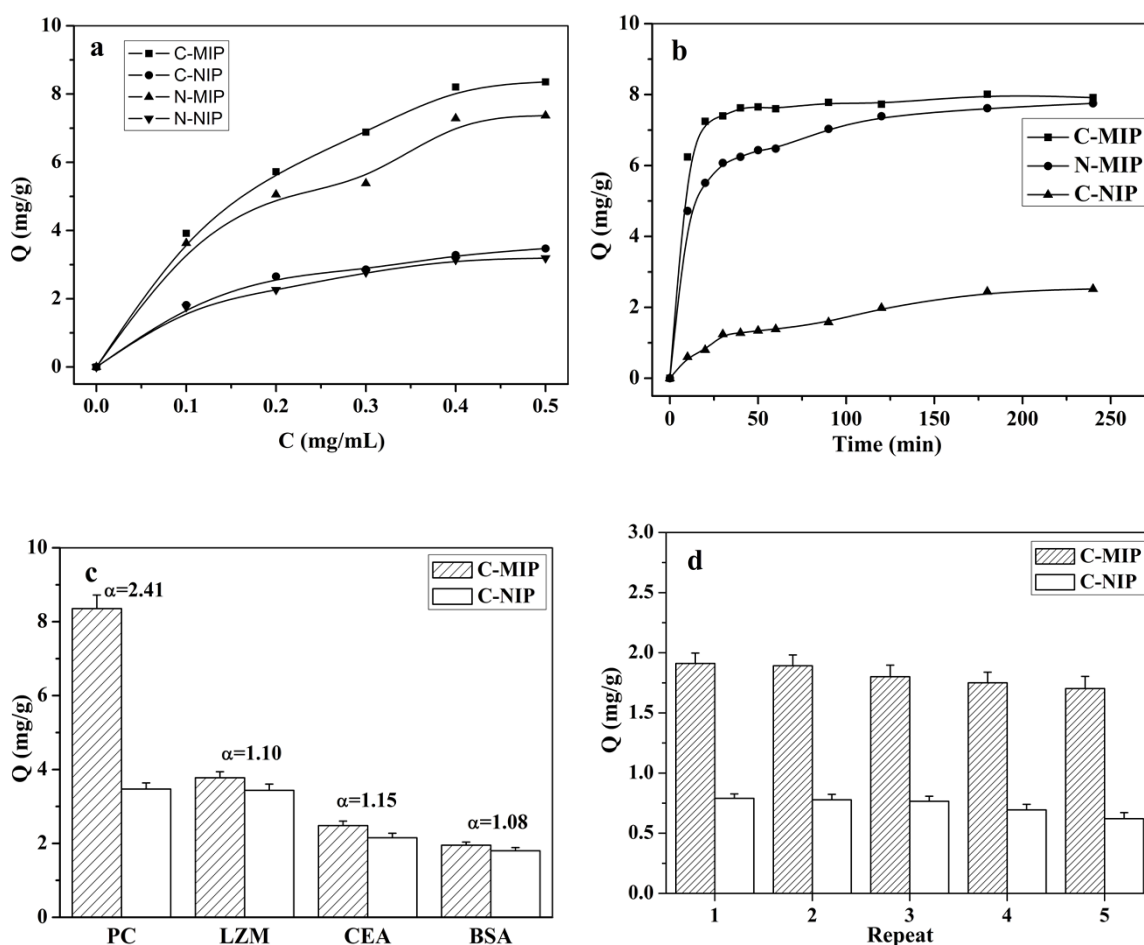

**Fig. S3** Scatchard plots of the C-MIPs.

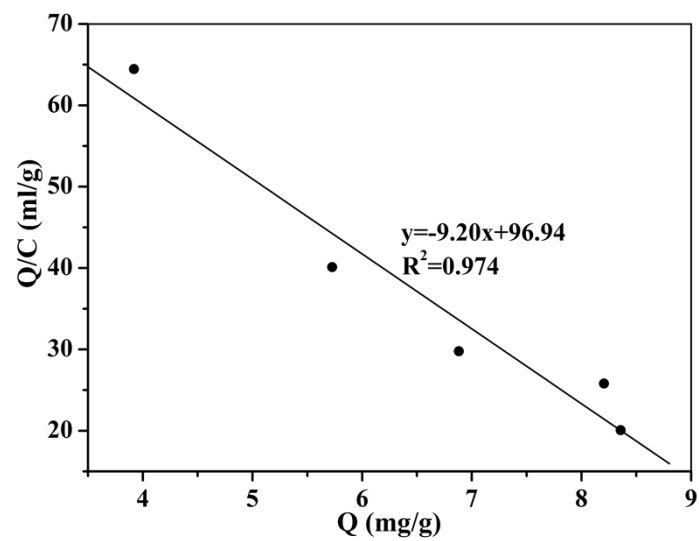

**Fig. S4** Fluorescence microscopy images of particles: (a) C-MIP, (b) C-MIP in the presence of phycocyanin, and (c) bright-field image of (b).

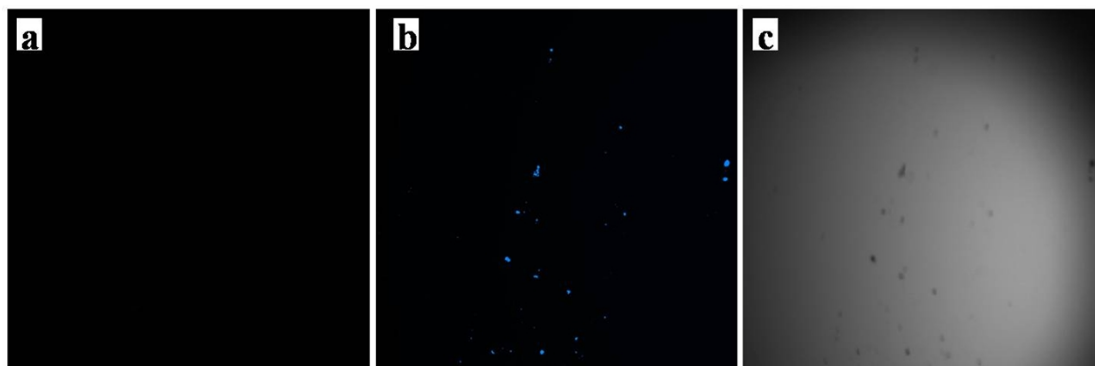

**Table S1** Isotherm model parameters for the C-MIP and N-MIP.

| Isotherm model                                                                                 | Parameter                 | C-MIP | N-MIP |
|------------------------------------------------------------------------------------------------|---------------------------|-------|-------|
| Langmuir<br>$\left( \frac{C_e}{Q_e} = \frac{1}{Q_{\max}} C_e + \frac{1}{K_f Q_{\max}} \right)$ | $R^2$ <sup>(a)</sup>      | 0.988 | 0.952 |
|                                                                                                | $Q_{\max}$ <sup>(b)</sup> | 13.61 | 10.19 |
|                                                                                                | $K_f$ <sup>(c)</sup>      | 0.311 | 0.352 |
| Freundlich<br>$\left( \lg Q_e = \frac{1}{n} \lg C_e + \lg K_f \right)$                         | $R^2$                     | 0.979 | 0.940 |
|                                                                                                | $K_f$ <sup>(d)</sup>      | 12.01 | 10.33 |
|                                                                                                | $1/n$ <sup>(e)</sup>      | 0.467 | 0.413 |

<sup>a</sup> Correlation coefficient.

<sup>b</sup> Maximum binding capacity, mg/g.

<sup>c</sup> Langmuir constant.

<sup>d</sup> Indicative constant for adsorption capacity of the adsorbent.

<sup>e</sup> Ranging from 0 to 1, measuring the adsorption intensity or surface heterogeneity.
